# Supplementary material for: Controlled growth of 3D topological insulator BiSb(Te 1− y Se y ) 3 nanocrystals via chemical vapor transport
Source: Royal Society of Chemistry journal article supplement (doi:10.1039/d4tc02508c), 2024-01-01
Supplement: d4tc02508c1.pdf [file d4tc02508c1.pdf]

## Controlled Growth of 3D Topological Insulator $\text{BiSb}(\text{Te}_{1-y}\text{Se}_y)_3$ Nanocrystals by Chemical Vapor Transport

Nour Abdelrahman <sup>abcd\*</sup>, Titouan Charvin <sup>a</sup>, Samuel Froeschke <sup>a</sup>, Romain Giraud <sup>ae</sup>, Joseph Dufouleur <sup>a</sup>, Alexey Popov <sup>a</sup>, Sandra Schiemenz <sup>a</sup>, Daniel Wolf <sup>a</sup>, Bernd Büchner <sup>af</sup>, Michael Mertig <sup>bg</sup>, and Silke Hampel <sup>a\*</sup>

<sup>a</sup>Leibniz Institute for Solid State and Materials Research Dresden, Helmholtzstraße 20, 01069 Dresden, Germany. E-mail: n.abdelrahman@ifw-dresden.de; Tel: +4935146591116.

<sup>b</sup>Institute of Physical Chemistry, Technische Universität Dresden, 01062 Dresden, Germany

<sup>c</sup>Department of Chemistry, Faculty of Applied Sciences, Palestine Technical University-Kadoorie, Jaffa Street, Tulkarm, P.O. Box 7, Palestine.

<sup>d</sup> Helmholtz-Zentrum Dresden-Rossendorf e.V. D-01328 Dresden, Germany.

<sup>e</sup>Université Grenoble Alpes, CNRS, CEA, Grenoble-INP, Spintec, 38054 Grenoble, France

<sup>f</sup>Institute of Solid State and Materials Physics, Technische Universität Dresden, Dresden, 01062, Germany

<sup>g</sup>Kurt-Schwabe-Institut für Mess- und Sensortechnik Meinsberg e.V., Kurt-Schwabe-Straße 4, Waldheim 04736, Germany

\*Contact E-mail: [n.abdelrahman@ifw-dresden.de](mailto:n.abdelrahman@ifw-dresden.de). (Nour Abdelrahman)

## Supplementary data

**SI. 1.** Thermodynamic data for the condensed species used in the simulation

| Formula                               | State | T    | H(T)<br>inJ·mol <sup>-1</sup> | S(T)<br>inJ·mol <sup>-1</sup> ·K <sup>-1</sup> | a          | b            | c          | d            | e      |
|---------------------------------------|-------|------|-------------------------------|------------------------------------------------|------------|--------------|------------|--------------|--------|
| Bi                                    | S     | 298  | 0                             | 56.735                                         | 11.849     | 3.05E-02     | 4.105E+05  |              |        |
| Bi (l)                                | L     | 544  | 9271.870                      | 71.997                                         | 19.016     | 1.04E-02     | 2.07E+06   | -3.979E-06   |        |
| Bi <sub>2</sub> Te                    | S     | 298  | -27614.4                      | 175.728                                        | 80.7512    |              |            |              |        |
| BiTe                                  | S     | 298  | -27196                        | 110.876                                        | 53.9736    |              |            |              |        |
| BiSe                                  | S     | 298  | -53136.8                      | 102.508                                        | 53.5552    |              |            |              |        |
| Bi <sub>2</sub> O <sub>3</sub>        | S     | 298  | -578010                       | 149.81                                         | 96.780     | 0.04633747   | 249291.3   | -6.626E-09   |        |
| Bi <sub>2</sub> O <sub>3</sub> (beta) | S     | 1003 | -563676.81                    | 149.257021                                     | 149.7      |              |            |              |        |
| Bi <sub>2</sub> O <sub>3</sub> (l)    | L     | 1098 | -590808.97                    | 94.464161                                      | 202        |              |            |              |        |
| Sb                                    | S     | 298  | 0                             | 45.522                                         | 30.472     | -0.015384568 | -199995.2  | 1.794E-05    |        |
| Sb (l)                                | L     | 904  | 17530.47                      | 62.707929                                      | 31.38      | 0.06611      |            |              |        |
| Sb <sub>2</sub> O <sub>3</sub>        | S     | 298  | -720305                       | 110.449                                        | 134.7      |              | -802800    |              | -419.2 |
| Sb <sub>2</sub> O <sub>3</sub> (beta) | S     | 298  | -703623.52                    | 134.62452                                      | 92.05      | 0.06611      |            |              |        |
| Sb <sub>2</sub> O <sub>3</sub> (l)    | L     | 298  | -662675.9                     | 172.405918                                     | 156.9      | 0.1454735    | 2454752.8  |              |        |
| Sb <sub>2</sub> O <sub>4</sub>        | S     | 298  | -907509.6                     | 127.1936                                       | 47.019792  |              | -2182000   |              | 151.4  |
| Sb <sub>2</sub> O <sub>5</sub>        | S     | 298  | -971901                       | 125.102                                        | 133.4      | 0.034088     |            |              |        |
| SbO <sub>2</sub>                      | S     | 298  | -453754.8                     | 63.597                                         | 47.279     | 0.022676     |            | -0.000012865 |        |
| Se                                    | S     | 298  | 0                             | 42.2584                                        | 11.7535    | 0.047225     | 85927.9    |              |        |
| Se (l)                                | L     | 210  | 3661.58                       | 48.349019                                      | 134.7248   |              |            |              |        |
| Se <sub>2</sub> O <sub>5</sub>        | S     | 298  | -413379.15                    | 158.992                                        | 110.7      |              |            |              | -726   |
| SeO <sub>2</sub>                      | S     | 298  | -225350                       | 66.693                                         | 76.5672    | 0.07223      |            |              |        |
| SeO <sub>3</sub>                      | S     | 298  | -170288.79                    | 96.232                                         | 35.6687    | -0.031668718 | -310029    | 3.14425E-05  |        |
| Te                                    | S     | 298  | 0                             | 49.221                                         | 126.031802 | -0.44388672  | -1655855.3 | 0.000565245  |        |
| Te(l)                                 | L     | 298  | 10925.22                      | 62.246118                                      | 12.75016   | 0.26083056   | 1748912    |              |        |
| H <sub>2</sub> TeO <sub>4</sub>       | S     | 298  | -715000                       | 99.759999                                      | 65.18672   | 0.01456032   | -502080    |              |        |
| TeO <sub>2</sub>                      | S     | 298  | -323423                       | 74.057                                         | 65.1872    | 0.01456032   | -502080    |              |        |
| TeO <sub>2</sub> (l)                  | L     | 298  | -298181.04                    | 98.930644                                      | 167.36     |              |            |              |        |
| Bi <sub>2</sub> Te <sub>3</sub> (l)   | L     | 870  | 24661.72                      | 364.409986                                     | 112.88432  | 0.0531368    |            |              |        |
| Sb <sub>2</sub> Te <sub>3</sub> (l)   | L     | 298  | 34506.38                      | 347.269875                                     | 188.28     |              |            |              |        |
| Bi <sub>2</sub> Se <sub>3</sub> (l)   | L     | 995  | -102830.14                    | 237.782448                                     | 118.74192  | 0.02092      |            |              |        |
| Sb <sub>2</sub> Se <sub>3</sub> (l)   | L     | 298  | -78770.27                     | 266.642811                                     | 118.74192  | 0.02092      |            |              |        |
| Sb <sub>2</sub> Se <sub>3</sub>       | S     | 298  | -127612                       | 212.129                                        | 86.818     | 0.0489528    |            |              |        |
| Bi <sub>2</sub> Se <sub>3</sub>       | S     | 298  | -139954.8                     | 239.7432                                       | 112.88432  | 0.0531368    |            |              |        |
| Sb <sub>2</sub> Te <sub>3</sub>       | S     | 298  | -56484                        | 246.438                                        | 107.989    | 0.055229     |            |              |        |
| Bi <sub>2</sub> Te <sub>3</sub>       | S     | 298  | -78659                        | 261.082                                        |            |              |            |              |        |

\*Cp function d

The units of th

## Supplementary data

### SI. 2. Thermodynamic data for the gaseous species used in the simulations

| Formula                        | T     | H(T)<br>inJ·mol <sup>-1</sup> | S(T)<br>inJ·mol <sup>-1</sup> ·K <sup>-1</sup> | a         | b          | c          | d          | e          | f         | g |
|--------------------------------|-------|-------------------------------|------------------------------------------------|-----------|------------|------------|------------|------------|-----------|---|
| Ar                             | 298.0 | 0.0                           | 154.845                                        | 2.079E+01 |            |            |            |            |           |   |
| H                              | 298.0 | 217999.0                      | 114.716                                        | 2.079E+01 |            |            |            |            |           |   |
| H <sub>2</sub>                 | 298.0 | 0.000                         | 130.680                                        | 1.983E+01 | 3.078E-03  | -2.952E+05 | 1.430E-06  | 1.949E+02  |           |   |
| H <sub>2</sub> O               | 298.0 | -241834.0                     | 188.834                                        | 2.578E+01 | 1.495E-02  | -2.800E+04 | -5.524E-07 |            | 1.107E+03 |   |
| O                              | 298.0 | 249173                        | 161.058                                        | 1.996E+01 | 2.639E-04  | 5.865E+04  | -3.695E-08 | 2.095E+01  |           |   |
| O <sub>2</sub>                 | 298.0 | 0                             | 205.147                                        | 2.692E+01 | 1.698E-02  | 2.293E+05  | -6.766E-06 | -7.916E+01 |           |   |
| Bi                             | 298   | 210873.6                      | 187.009                                        | 2.079E+01 |            |            |            |            |           |   |
| Bi <sub>2</sub>                | 298.0 | 220078.4                      | 273.743                                        | 3.679E+01 | 7.615E-04  |            |            |            |           |   |
| BiSe                           | 298   | 166523.2                      | 269.559044                                     | 3.670E+01 | 7.950E-04  |            |            |            |           |   |
| BiTe                           | 298.0 | 190372.0                      | 273.006                                        | 3.688E+01 | 9.120E-04  |            |            |            |           |   |
| BiO                            | 298.0 | 113595.6                      | 246.547                                        | 3.611E+01 | 8.368E-04  | -3.305E+05 |            |            |           |   |
| Sb                             | 298.0 | 264554.320                    | 180.264                                        | 2.079E+01 |            |            |            |            |           |   |
| Sb <sub>2</sub>                | 500.0 | 235879.23                     | 254.648                                        | 3.724E+01 |            |            |            |            |           |   |
| Sb <sub>4</sub>                | 500.0 | 208775.96                     | 353.228                                        | 8.264E+01 |            |            |            |            |           |   |
| SbSe                           | 298   | 212129                        | 255.877364                                     | 3.635E+01 | 1.172E-03  |            |            |            |           |   |
| SbTe                           | 298.0 | 202087.2                      | 262.488                                        | 3.630E+01 | 1.239E-03  | 3.820E+03  | -1.948E-08 |            |           |   |
| SbOH                           | 298   | -133523.5                     | 133.812444                                     | 9.018E+01 |            |            |            |            |           |   |
| Sb(OH) <sub>2</sub>            | 298   | -493667.4                     | 156.091444                                     | 134.8493  |            |            |            |            |           |   |
| Sb <sub>4</sub> O <sub>6</sub> | 500.0 | -125565.39                    | 429.455                                        | 2.234E+02 |            |            |            |            |           |   |
| SbH <sub>3</sub>               | 298.0 | 145101                        | 233.075                                        | 5.050E+01 | 1.870E+00  | -1.318E+06 |            |            |           |   |
| SbO                            | 298.0 | 89297                         | 238.346                                        | 5.463E+01 | -5.428E-03 |            |            | -3.655E+02 |           |   |
| Se                             | 298   | 235350                        | 176.715                                        | 21.464    | 0.001506   | -92000     |            |            |           |   |
| Se <sub>2</sub>                | 298   | 136699                        | 243.618                                        | 44.601    | -0.002657  | -251000    |            |            |           |   |
| Se <sub>3</sub>                | 298   | 173518                        | 315.038                                        | 58.145    | 0.003038   | -222000    |            |            |           |   |
| Se <sub>4</sub>                | 298   | 180631                        | 379.204                                        | 83.082    | 0.000033   | -251000    |            |            |           |   |

## Supplementary data

SI. 2. Thermodynamic data for the gaseous species used in the simulations – continued

| Formula                         | T     | H(T)<br>inJ·mol <sup>-1</sup> | S(T)<br>inJ·mol <sup>-1</sup> ·K <sup>-1</sup> | a         | b          | c          | d          | e         | f | g         |
|---------------------------------|-------|-------------------------------|------------------------------------------------|-----------|------------|------------|------------|-----------|---|-----------|
| Se <sub>5</sub>                 | 298   | 135444                        | 385.359                                        | 107.926   | 0.000088   | -590000    |            |           |   |           |
| Se <sub>6</sub>                 | 298   | 132515                        | 433.613                                        | 132.905   | 0.000067   | -594000    |            |           |   |           |
| Se <sub>7</sub>                 | 298   | 141302                        | 486.474                                        | 157.762   | 0.000113   | -828200    |            |           |   |           |
| Se <sub>8</sub>                 | 298   | 152176                        | 531.159                                        | 182.74    | 0.000092   | -494000    |            |           |   |           |
| SeO                             | 298   | 62341                         | 233.994                                        | 3.494E+01 | 1.506E-03  | -3.680E+05 |            |           |   |           |
| SeO <sub>2</sub>                | 298   | -107842                       | 264.998                                        | 5.284E+01 | 3.088E-03  | -9.200E+05 |            |           |   |           |
| H <sub>2</sub> Se               | 298   | 29288                         | 218.933                                        | 3.176E+01 | 1.464E-02  | -1.297E+05 |            |           |   |           |
| SeO <sub>2</sub>                | 298   | -107842                       | 264.998                                        | 5.284E+01 | 3.088E-03  |            |            |           |   |           |
| H <sub>2</sub> Se               | 298   | 29288                         | 218.933                                        | 3.176E+01 | 1.464E-02  |            |            |           |   |           |
| TeSe                            | 298   | 151464                        | 256.882177                                     | 3.348E+01 | 3.743E-02  | -3.451E+05 | -4.053E-05 |           |   | 1.305E-08 |
| Te                              | 298   | 209451                        | 182.707                                        | 2.079E+01 |            |            |            |           |   |           |
| Te <sub>2</sub>                 | 298.0 | 162063                        | 258.944                                        | 3.570E+01 | -1.507E-03 | 1.635E-05  |            |           |   |           |
| Te <sub>3</sub>                 | 298.0 | 203223.04                     | 335.942                                        | 5.802E+01 | 4.022E-04  | -1.428E+05 | -3.159E-07 |           |   | 8.504E-11 |
| Te <sub>4</sub>                 | 298.0 | 217321.89                     | 379.093                                        | 8.282E+01 | 7.007E-04  | -2.418E+05 | -5.506E-07 |           |   | 1.483E-10 |
| Te <sub>5</sub>                 | 298.0 | 220026.76                     | 462.011                                        | 1.079E+02 | 3.929E-04  | -2.155E+05 | -3.096E-07 |           |   | 8.367E-11 |
| Te <sub>6</sub>                 | 298.0 | 226560.81                     | 491.477                                        | 1.329E+02 | 3.529E-04  | -2.504E+05 | -2.798E-07 |           |   | 7.592E-11 |
| Te <sub>7</sub>                 | 298.0 | 254235.86                     | 558.072                                        | 1.578E+02 | 4.434E-04  | -3.050E+05 | -3.503E-07 |           |   | 9.496E-11 |
| Te <sub>2</sub> O <sub>2</sub>  | 298.0 | -108784                       | 327.298                                        | 8.211E+01 | 5.577E-03  | -1.180E+06 |            |           |   |           |
| TeO                             | 298   | 744750                        | 240.689                                        | 3.531E+01 | 1.339E-03  | -3.47E+05  |            |           |   |           |
| TeO <sub>2</sub>                | 298   | -59413                        | 274.998244                                     | 5.477E+01 | 2.414E-03  | -1.183E+06 | -5.336E-06 |           |   |           |
| Te(OH) <sub>2</sub>             | 298   | -374860                       | 228.114                                        | 6.587E+01 | 4.215E-02  | -6.585E+04 | -2.668E-06 | 1.157E+02 |   |           |
| TeOH                            | 298   | -102890                       | 187.869                                        | 4.250E+01 | 3.212E-02  | -3.293E+04 |            | 5.785E+01 |   |           |
| H <sub>2</sub> Te               | 298.0 | 99579                         | 228.974                                        | 3.548E+01 | 1.205E-02  | -3.096E+05 |            |           |   |           |
| H <sub>2</sub> TeO <sub>3</sub> | 298.0 | 430000                        | 322.586                                        | 7.933E+01 | 5.064E-02  | 4.881E+04  | -8.719E-06 | 7.612E+01 |   |           |

Supplementary data

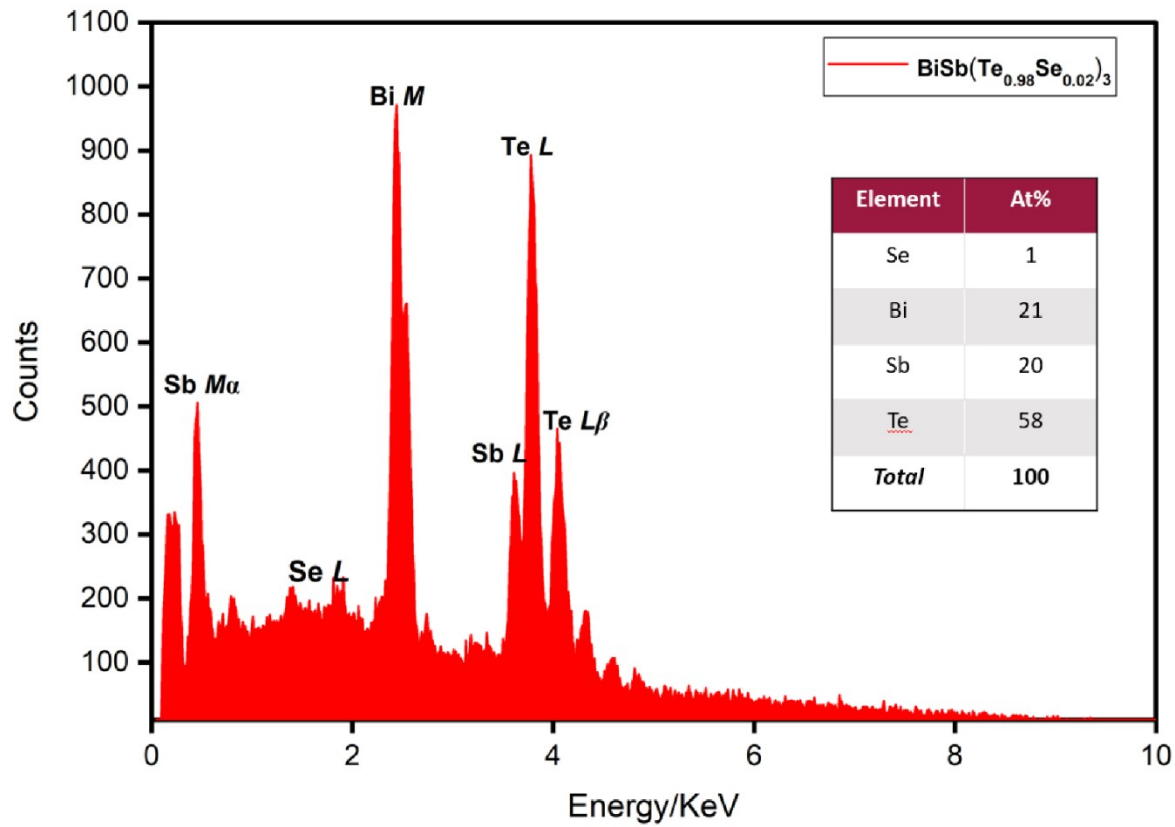

SI. 3. EDX spectrum (15 kV) of bulk  $\text{BiSb}(\text{Te}_{0.98}\text{Se}_{0.02})_3$  used as starting material for nanocrystals synthesis.

Supplementary data

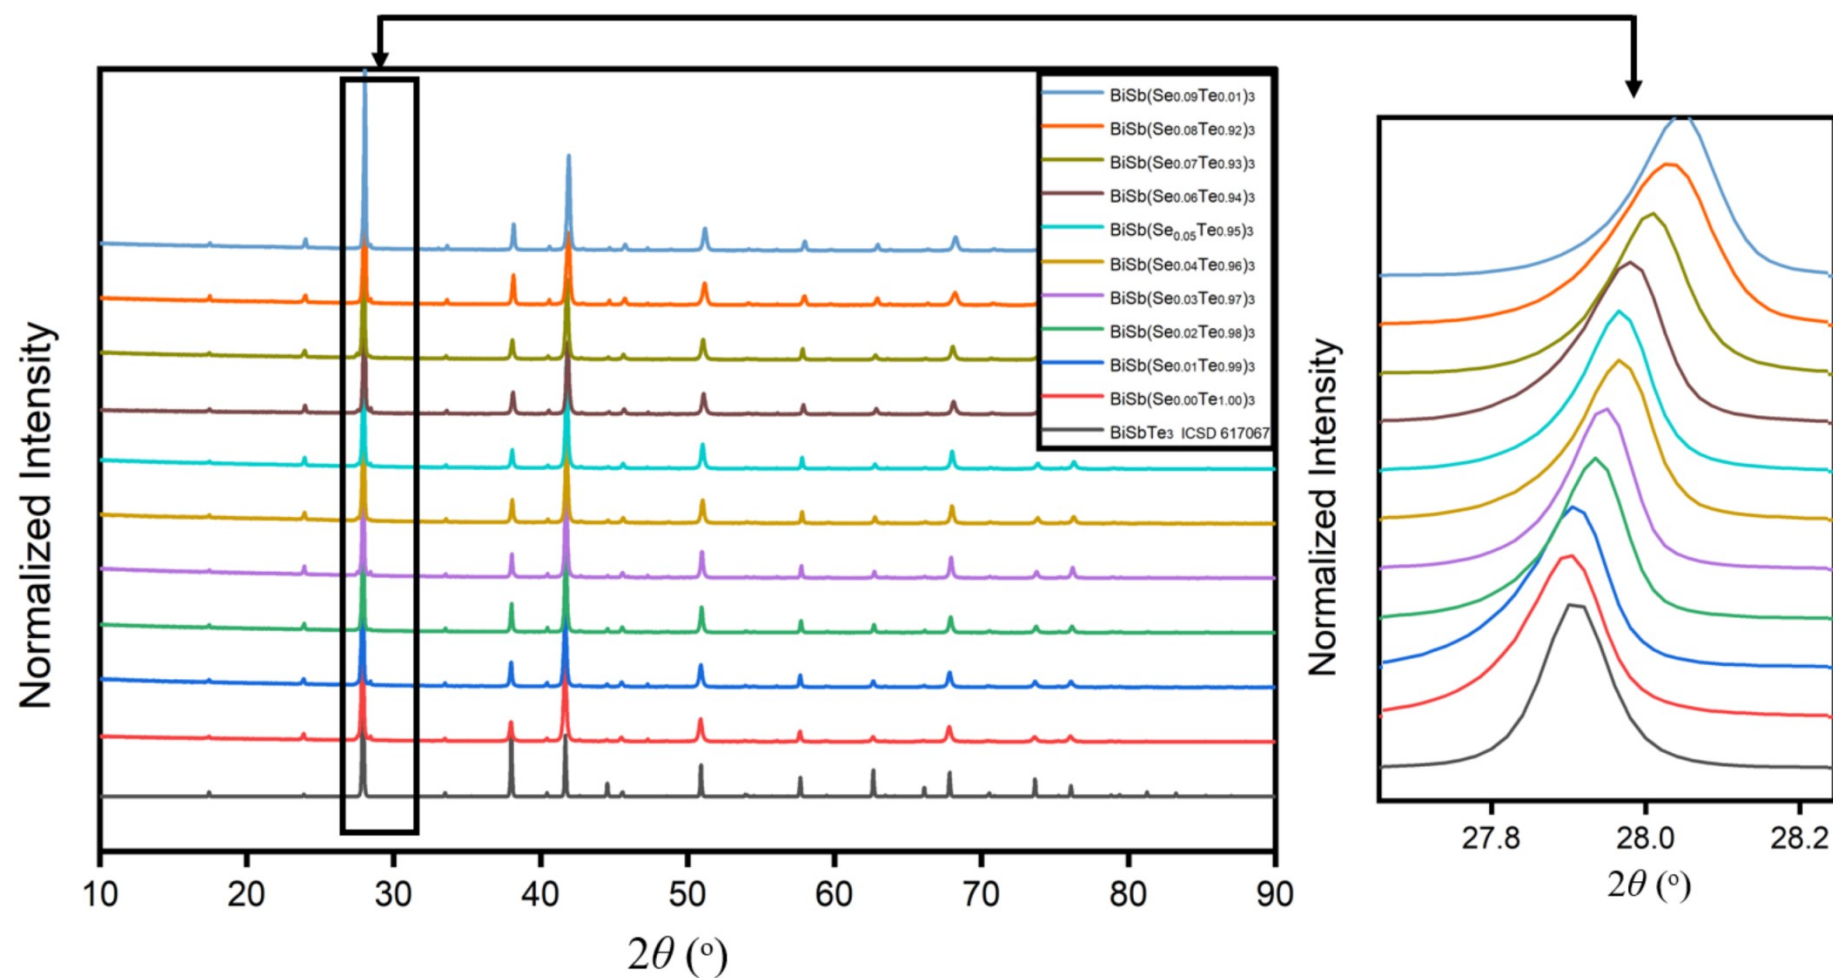

SI. 4. pXRD patterns of bulk BiSb(Te<sub>1-y</sub>Se<sub>y</sub>)<sub>3</sub> ( $y = 0, 0.01, 0.02, \dots, 0.09$ ) and the reference pattern of BiSbTe<sub>3</sub>, on the right side, main peak enlargement patterns (to show the corresponding peak shift).

## Supplementary data

**SI. 5.** Summary of the growth conditions for different samples of  $\text{BiSb}(\text{Te}_{1-y}\text{Se}_y)_3$  nanocrystals.

| Title | Substrate               | $T_1/^\circ\text{C}$ | $T_2/^\circ\text{C}$ | $\Delta T/$<br>K | $D/$<br>cm | $t/$ h |
|-------|-------------------------|----------------------|----------------------|------------------|------------|--------|
| S1    | $\text{SiO}_2$          | 500                  | 420                  | 80               | 12         | 8      |
| S2    | $\text{SiO}_2$          | 500                  | 330                  | 170              | 12         | 8      |
| S3    | $\text{SiO}_2$          | 500                  | 330                  | 170              | 12         | 4      |
| S4    | $\text{SiO}_2$          | 560                  | 390                  | 170              | 12         | 4      |
| S5    | $\text{SiO}_2$          | 630                  | 460                  | 170              | 12         | 4      |
| S6    | $\text{SiO}_2$          | 500                  | 380                  | 120              | 8          | 12     |
| S7    | $\text{SiO}_2$          | 500                  | 380                  | 120              | 16         | 12     |
| S8    | $\text{SiO}_2$          | 560                  | 390                  | 170              | 12         | 4      |
| S9    | $\text{SiO}_2$          | 560                  | 390                  | 170              | 12         | 8      |
| S10   | $\text{SiO}_2$          | 560                  | 390                  | 170              | 12         | 12     |
| S11   | $\text{SiO}_2$          | 560                  | 390                  | 170              | 12         | 16     |
| S12   | $\text{Al}_2\text{O}_3$ | 500                  | 420                  | 80               | 12         | 4      |
| S13   | Si                      | 500                  | 380                  | 120              | 12         | 8      |
| S14   | $\text{BaF}_2$          | 500                  | 420                  | 80               | 12         | 4      |

$T_1$  indicates the temperature of source zone.  $T_2$  indicates temperature of sink zone (substrate).  $\Delta T$  is the temperature gradient.  $D$  is the distance between source and sink zones.  $t$  is the growth duration.

Supplementary data

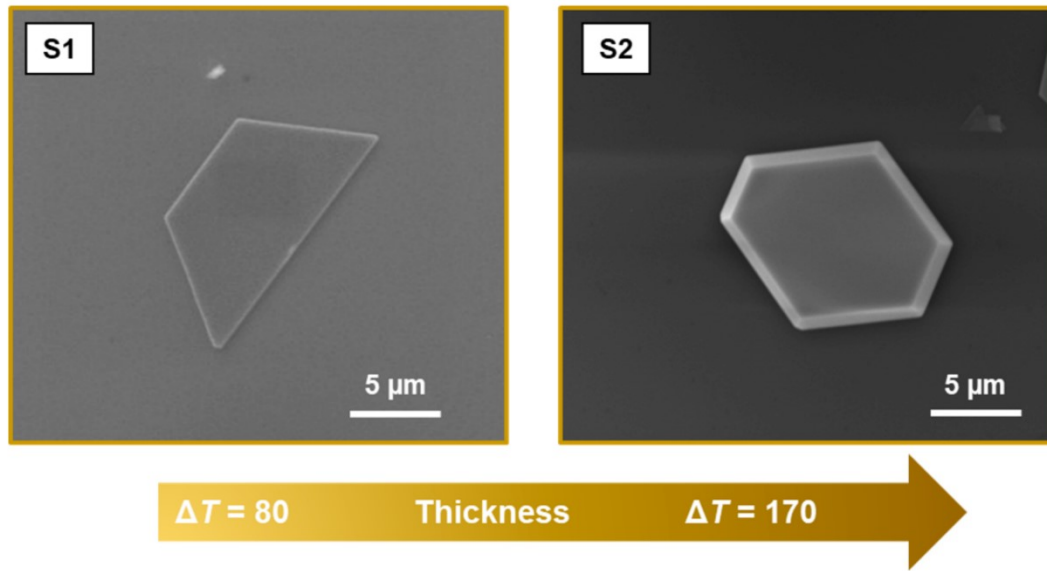

**SI. 6.** SEM images of BiSb(Te<sub>1-y</sub>Se<sub>y</sub>)<sub>3</sub> flakes show thickness – dependence of the temperature gradient. the temperature gradient. S1 and S2 were grown at  $T_1 = 500$  °C,  $T_2 = 420$  °C,  $\Delta T = 80$  and  $T_1 = 500$  °C,  $T_2 = 330$  °C,  $\Delta T = 170$  respectively.



Supplementary data

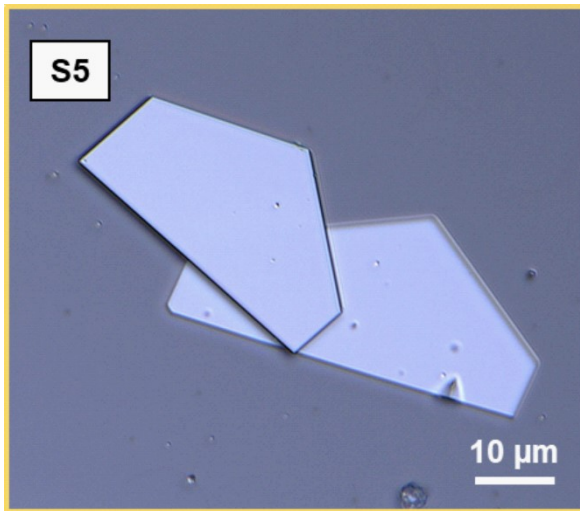

SI. 7. Optical microscope image of large size  $\text{BiSb}(\text{Te}_{1-y}\text{Se}_y)_3$  nanocrystals prepared at  $T_1 = 630^\circ\text{C}$ ,  $T_2 = 460^\circ\text{C}$ .

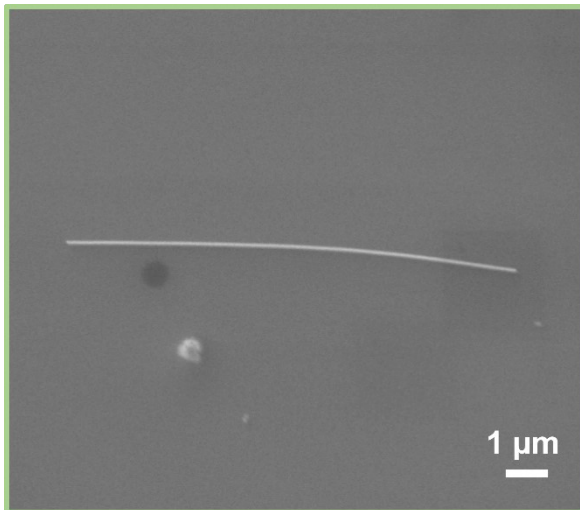

SI. 8. SEM image of  $\text{BiSb}(\text{Te}_{1-y}\text{Se}_y)_3$  nanowire prepared at short growth duration  $t = 4$  h.

Supplementary data

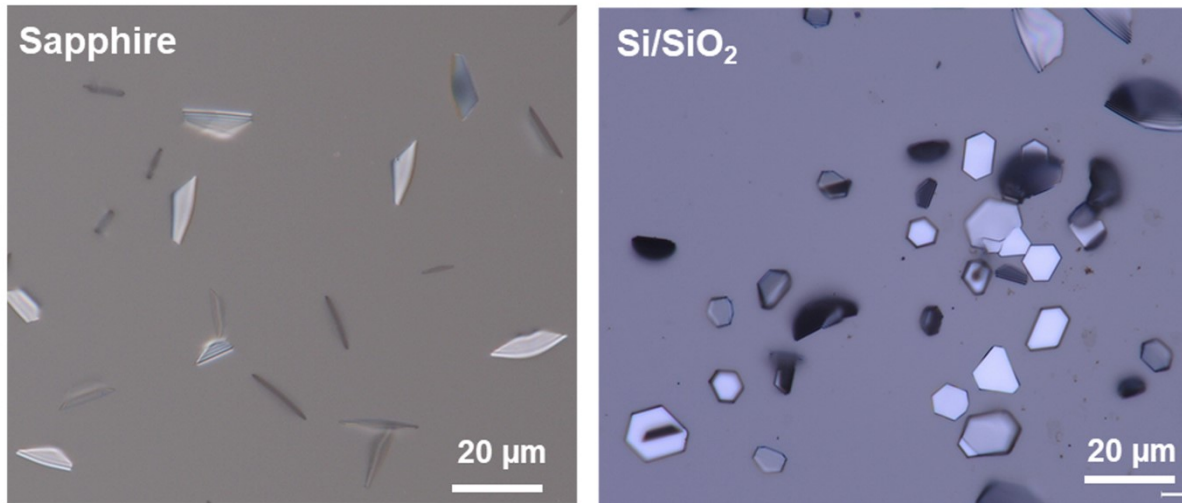

SI. 9. Optical microscope images of  $\text{BiSb}(\text{Te}_{1-y}\text{Se}_y)_3$  nanocrystals show different growth direction on different substrate materials.

## Supplementary data

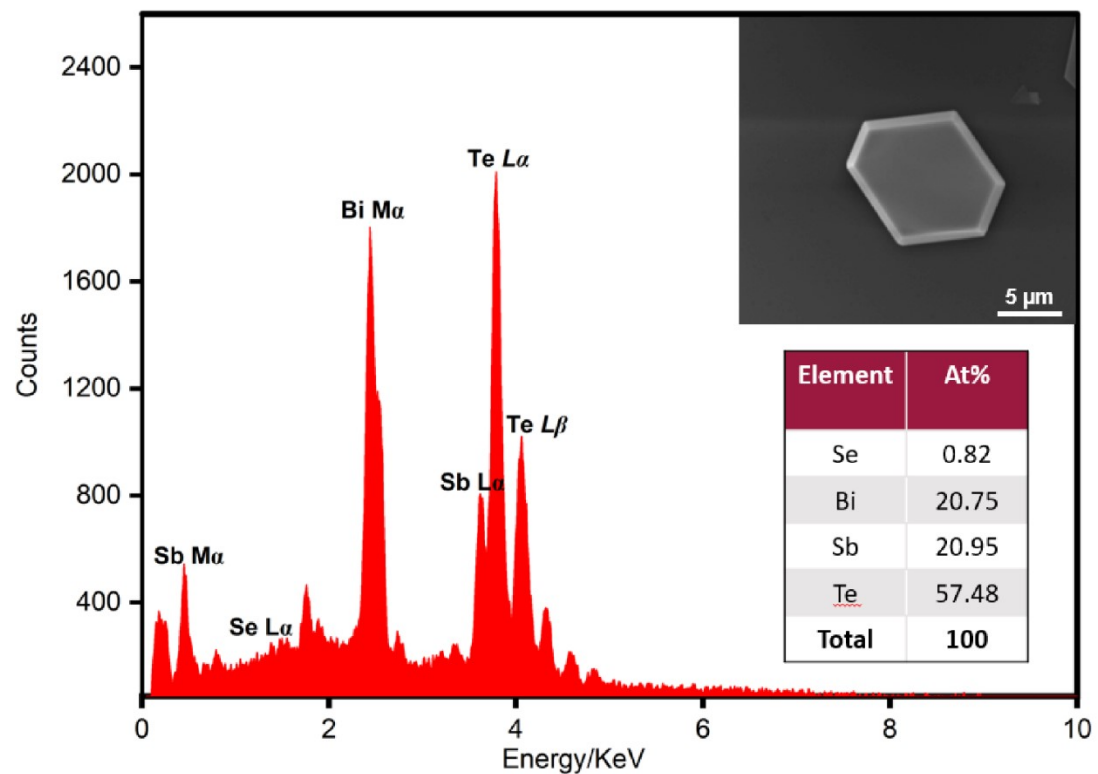

SI. 10. EDX spectrum (15 kV) of BiSb(Te<sub>0.99</sub>Se<sub>0.01</sub>)<sub>3</sub> crystal.

## Supplementary data

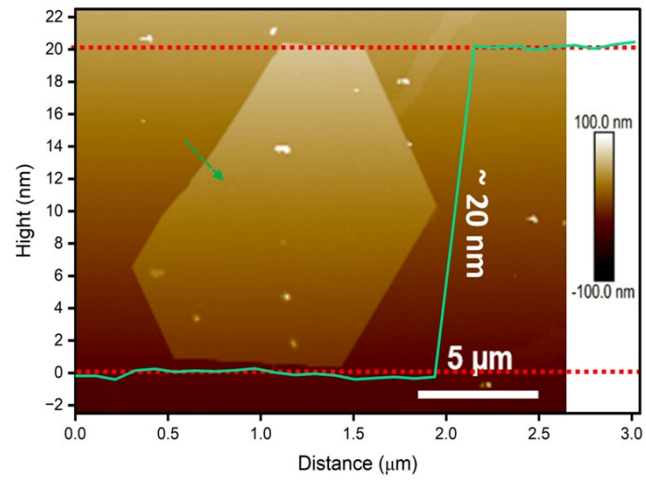

**SI. 11.** AFM image of a thin  $\text{BiSb}(\text{Te}_{1-y}\text{Se}_y)$  nanocrystal demonstrating the planer hexagonal morphology.
